# Supplementary material for: Comparison of 24-h Diet Records, 24-h Urine, and Duplicate Diets for Estimating Dietary Intakes of Potassium, Sodium, and Iodine in Children
Source: PubMed Central journal article supplement (PMC6950498; doi:10.3390/nu11122927), 2019-12-03
Supplement: nutrients-11-02927-s001.pdf [file nutrients-11-02927-s001.pdf]

**Table S1.** Mean intakes of sodium, potassium, and iodine by sex and method of measurement.

| <b>Boys</b>               | <b>N</b> | <b>Sodium (mg)</b> | <b>Potassium (mg)</b> | <b>Iodine (µg)</b> |
|---------------------------|----------|--------------------|-----------------------|--------------------|
| 24-hour urine, mean (SD)  | 41       | 2187 (483)         | 1441 (389)            | 77 (19)            |
| 24-hour record, mean (SD) | 43       | 2246 (146)         | 2111 (389)            | 52 (6)             |
| Duplicate diet, mean (SD) | 22       | 1938 (406)         | 2132 (560)            | 92 (18)            |
| <b>Girls</b>              |          |                    |                       |                    |
| 24-hour urine, mean (SD)  | 41       | 2050 (384)         | 1387 (301)            | 70 (14)            |
| 24-hour record, mean (SD) | 41       | 2199 (157)         | 2103 (108)            | 51 (6)             |
| Duplicate diet, mean (SD) | 15       | 1809 (405)         | 2231 (656)            | 99 (17)            |

**Table S2.** Correlations between measurement methods for sodium, potassium, and iodine

|                                                  | <b>N</b>        | <b>Sodium (mg)</b> | <b>Potassium (mg)</b> | <b>Iodine (µg)</b> |
|--------------------------------------------------|-----------------|--------------------|-----------------------|--------------------|
| Spearman's correlation coefficient:              |                 |                    |                       |                    |
| 24-hour urine & 24-hour recall                   | 82              | 0.33               | 0.32                  | 0.12               |
| 24-hour urine & duplicate diet                   | 36 <sup>a</sup> | 0.44               | 0.35                  | 0.65               |
| 24-hour recall & duplicate diet                  | 37 <sup>a</sup> | 0.47               | 0.48                  | 0.46               |
| Intraclass correlation coefficient: <sup>b</sup> |                 |                    |                       |                    |
| 24-hour urine & 24-hour recall                   | 82              | 0.32               | 0.21                  | 0.01               |
| 24-hour urine & duplicate diet                   | 36 <sup>a</sup> | 0.46               | 0.29                  | 0.49               |
| 24-hour recall & duplicate diet                  | 37 <sup>a</sup> | 0.50               | 0.51                  | 0.57               |

<sup>a</sup> Sodium and potassium had two missing participants for the duplicate diet; <sup>b</sup> Intraclass correlation coefficient calculated using a two-way mixed-effects model for consistency of agreement for individuals.
